# Supplementary material for: Mediterranean Diet Score: Associations with Metabolic Products of the Intestinal Microbiome, Carotid Plaque Burden, and Renal Function
Source: PubMed Central journal article supplement (PMC6024790; doi:10.3390/nu10060779), 2018-06-16
Supplement: nutrients-10-00779-s001.pdf [file nutrients-10-00779-s001.pdf]

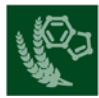

**Mediterranean diet score: associations with metabolic products of the intestinal  
microbiome, carotid plaque burden and renal function  
Supplementary Material**

Michael Pignanelli BMSc., Caroline Just M.D., Chrysi Bogiatzi M.D., Vincent Dinculescu M.D., Gregory Gloor Ph.D., Emma Allen-Vercoe Ph.D., Gregor Reid Ph.D., Bradley L. Urquhart Ph.D., Kelsey N. Ruetz BMSc., Thomas J. Velenosi PhD, J. David Spence M.D.

**Calculation of L-carnitine intake from Harvard FFQ**

Michael Pignanelli BMSc.

Food intake over the past year was assessed using the 131 item self-reported and semi-quantitative Harvard Food Frequency Questionnaire (FFQ). As described previously, respondents were asked to select one of nine levels for each standardized food item, based on average frequency of consumption in the past year. The nine options ranged from “never, or less than once per month” to “six or more times per day”. Using an approach outlined by Dr. Walter Willett<sup>1</sup>, estimated number of servings per day was calculated by converting patient responses as follows: 1 = 0.08, 2 = 0.14, 3 = 0.43, 4 = 0.8, 5 = 1.00, 6 = 2.50, 7 = 4.50, 8 = 6.00, and 9 = 0.00. Any missing values were assigned a “0” value indicating no consumption of that food item. The number of servings per day was then multiplied by standard serving size of each food to get total amount per day. When serving sizes were not explicit, assumptions were made based on food labels: 1 slice of bacon = 1 oz., shrimp = 3 oz., tuna = 4 oz., tuna or dark meat fish = 4 oz. The amounts per day for each food item was then converted to number of 100g servings.

The following items from the FFQ were used to estimate total free L-carnitine: “chicken sandwich”, “chicken without skin”, “chicken liver”, “liver”, “bacon”, “extra-lean hamburger”, “hamburger”, “pork”, “beef or lamb as a main dish”, “tuna”, “shrimp”, “dark fish”. Although not exhaustive for all sources of L carnitine, these entries were selected because meat products are the most important sources of L carnitine in human diets.<sup>2</sup> Estimated free L-carnitine density (mg/100g portion) of each individual food item was taken from values published by Demarquoy et al.<sup>3</sup>, and online from the Linus Pauling Institute micronutrient database at Oregon State University (available online at <http://lpi.oregonstate.edu/mic/dietary-factors/Lcarnitine>), as needed.<sup>3,4</sup>

For items on the FFQ that were not found, it was assumed those items held values similar to related food items. For instance, “turkey meat with skin” and “lean hamburger” were given the same carnitine density as “chicken meat with skin” and “regular hamburger”, respectively. When cut, cooking method of a particular meat, or, more than two meat items were included in the same food item category, the mean carnitine density value for all involved items was calculated for use. All items were then converted to mg/day and summed into a total carnitine

number per-day. Calculation and data management was accomplished using RStudio (Version 0.99.902 – © 2009-2016 RStudio, Inc.).

#### References

1. Willett W. *Nutritional epidemiology*. Oxford University Press, USA; 1998.
2. Lombard KA, Olson AL, Nelson SE, Rebouche CJ. Carnitine status of lactoovo vegetarians and strict vegetarian adults and children. *The American journal of clinical nutrition*. 1989;50:301-306
3. Demarquoy J, Georges B, Rigault C, Royer M-C, Clairet A, Soty M, et al. Radioisotopic determination of l-carnitine content in foods commonly eaten in western countries. *Food Chemistry*. 2004;86:137-142
4. Higdon J, Drake VJ, Hagen TM. L-carnitine. *Micronutrient Information Center*. 2002;2016

#### Supplemental Table 1. Intake of dietary precursors by quintiles of metabolite levels(5, 34-38)

(Mean in top row, SD in italics below)

TMAO = trimethylamine n-oxide; Pre-TMA = Pre-trimethylamine; total TMA precursor nutrients; the sum of choline-containing nutrients and L-carnitine intake per day.

| Metabolite                   | Dietary Precursor              | Quintile of metabolite level |                 |                 |                 |                 | P (ANOVA)  |
|------------------------------|--------------------------------|------------------------------|-----------------|-----------------|-----------------|-----------------|------------|
|                              |                                | 1 <sup>st</sup>              | 2 <sup>nd</sup> | 3 <sup>rd</sup> | 4 <sup>th</sup> | 5 <sup>th</sup> |            |
| <b>TMAO (µmol/L)</b>         |                                | 0.28                         | 0.62            | 1.18            | 2.48            | 13.46           | P <0.0001  |
|                              |                                | <i>0.13</i>                  | <i>0.11</i>     | <i>0.20</i>     | <i>0.68</i>     | <i>10.40</i>    |            |
|                              | Meat<br>g/day                  | 26.52                        | 26.08           | 26.50           | 28.34           | 25.55           | 0.98       |
|                              |                                | <i>16.00</i>                 | <i>19.94</i>    | <i>21.86</i>    | <i>24.91</i>    | <i>21.87</i>    |            |
|                              | Animal<br>protein<br>g/day     | 56.31                        | 51.23           | 50.93           | 44.48           | 44.03           | 0.08       |
|                              |                                | <i>30.05</i>                 | <i>23.89</i>    | <i>20.79</i>    | <i>17.89</i>    | <i>22.79</i>    |            |
|                              | Free<br>carnitine<br>mg/day    | 31.36                        | 26.46           | 27.38           | 24.65           | 22.48           | 0.20       |
|                              |                                | <i>22.11</i>                 | <i>15.11</i>    | <i>18.12</i>    | <i>14.23</i>    | <i>18.13</i>    |            |
|                              | Eggs<br>Per week               | 4.41                         | 3.74            | 5.14            | 3.48            | 3.57            | 0.43       |
|                              |                                | <i>4.23</i>                  | <i>5.04</i>     | <i>4.90</i>     | <i>4.63</i>     | <i>4.61</i>     |            |
|                              | Betaine +<br>choline<br>mg/day | 460.58                       | 463.68          | 463.21          | 449.26          | 436.50          | 0.98       |
|                              |                                | <i>208.69</i>                | <i>189.26</i>   | <i>152.29</i>   | <i>178.63</i>   | <i>327.47</i>   |            |
|                              | Pre-TMA<br>mg/day              | 496.91                       | 501.31          | 481.19          | 474.96          | 462.83          | 0.94       |
|                              |                                | <i>224.92</i>                | <i>191.01</i>   | <i>152.57</i>   | <i>187.12</i>   | <i>349.49</i>   |            |
| <b>P-cresyl<br/>(µmol/L)</b> | <b>sulfate</b>                 | 11.40                        | 26.67           | 38.07           | 55.98           | 93.29           | P < 0.0001 |
|                              |                                | <i>5.00</i>                  | <i>3.86</i>     | <i>3.55</i>     | <i>8.36</i>     | <i>30.46</i>    |            |
|                              | Animal<br>protein              | 53.58                        | 51.03           | 51.28           | 48.71           | 42.22           |            |
|                              |                                | <i>26.97</i>                 | <i>24.51</i>    | <i>23.94</i>    | <i>22.33</i>    | <i>21.00</i>    |            |

|                                         |                               |       |       |       |       |       |        |
|-----------------------------------------|-------------------------------|-------|-------|-------|-------|-------|--------|
| <b>Hippuric Acid (μmol/L)</b>           |                               | 1.19  | 2.46  | 3.96  | 6.62  | 19.41 | 0.0001 |
|                                         |                               | 0.48  | 0.44  | 0.47  | 1.20  | 12.52 |        |
|                                         | Glycine<br>g/day              | 3.57  | 2.98  | 3.11  | 3.24  | 3.11  | 0.35   |
|                                         |                               | 1.48  | 1.65  | 1.24  | 1.27  | 1.37  |        |
| <b>Indoxyl sulfate (μmol/L)</b>         |                               | 2.39  | 3.98  | 5.39  | 7.21  | 14.14 | 0.0001 |
|                                         |                               | 0.69  | 0.48  | 0.43  | 0.62  | 6.70  |        |
|                                         | Tryptophan<br>g/day           | 0.86  | 0.82  | 0.89  | 0.90  | 0.79  | 0.56   |
|                                         |                               | 0.38  | 0.36  | 0.35  | 0.46  | 0.28  |        |
| <b>P-cresyl glucuronide (μmol/L)</b>    |                               | 0.02  | 0.11  | 0.20  | 0.34  | 1.12  | 0.0001 |
|                                         |                               | 0.02  | 0.03  | 0.02  | 0.06  | 1.60  |        |
|                                         | Tyrosine<br>g/day             | 3.02  | 2.89  | 2.69  | 2.57  | 2.47  | 0.19   |
|                                         |                               | 1.31  | 1.25  | 1.23  | 1.05  | 1.07  |        |
| <b>Phenyl acetyl glutamine (μmol/L)</b> |                               | 0.62  | 1.33  | 2.13  | 3.17  | 8.02  | 0.0001 |
|                                         |                               | 0.22  | 0.21  | 0.23  | 0.49  | 5.72  |        |
|                                         | Phenylalanine<br>g/day        | 3.52  | 3.35  | 3.60  | 3.70  | 3.19  | 0.51   |
|                                         |                               | 1.53  | 1.31  | 1.57  | 1.93  | 1.06  |        |
|                                         | Glutamine<br>g/day            | 3.52  | 3.35  | 3.60  | 3.70  | 3.19  | 0.63   |
|                                         |                               | 1.53  | 1.31  | 1.57  | 1.93  | 1.06  |        |
| <b>Phenyl sulfate (μmol/L)</b>          |                               | 0.86  | 1.64  | 2.52  | 4.16  | 14.47 | 0.0001 |
|                                         |                               | 0.26  | 0.24  | 0.28  | 0.85  | 9.92  |        |
|                                         | Methionine<br>g/day           | 1.62  | 1.64  | 1.83  | 1.83  | 1.73  | 0.56   |
|                                         |                               | 0.72  | 0.75  | 0.87  | 0.82  | 0.61  |        |
|                                         | Vegetables<br>g/day           | 36.11 | 38.95 | 57.96 | 48.56 | 46.36 | 0.04   |
|                                         |                               | 24.23 | 31.11 | 44.44 | 28.91 | 36.98 |        |
|                                         | Vegetable<br>protein<br>g/day | 26.06 | 24.43 | 29.46 | 33.82 | 28.69 | 0.04   |
|                                         |                               | 13.65 | 10.93 | 12.74 | 22.04 | 11.85 |        |
|                                         | Fruits<br>servings/day        | 1.00  | 2.00  | 3.00  | 4.00  | 5.00  | 0.06   |
|                                         |                               | 13.62 | 16.83 | 24.53 | 19.05 | 19.31 |        |
|                                         | g/day                         |       |       |       |       |       |        |
|                                         | Meat<br>g/day                 | 49.45 | 31.14 | 23.32 | 26.84 | 19.10 |        |
|                                         |                               | 23.94 | 25.31 | 17.89 | 21.92 | 9.08  |        |
|                                         | Tyrosine<br>g/day             | 2.83  | 2.95  | 2.83  | 2.69  | 2.41  |        |
|                                         |                               | 1.29  | 1.33  | 1.23  | 1.13  | 0.99  |        |

**Supplementary Table 2. Nutrient intakes by quintile of TMAO levels**

|               |              | Descriptives |                |
|---------------|--------------|--------------|----------------|
|               |              | Mean         | Std. Deviation |
| Alanine (g)   | 1.00         | 3.9107       | 1.92167        |
|               | 2.00         | 3.7976       | 1.51022        |
|               | 3.00         | 3.7507       | 1.31236        |
|               | 4.00         | 3.4364       | 1.24996        |
|               | 5.00         | 3.3089       | 1.76578        |
|               | Total        | 3.6382       | 1.58413        |
|               | Arginine (g) | 1.00         | 4.6220         |
| 2.00          |              | 4.5346       | 1.76324        |
| 3.00          |              | 4.5016       | 1.70670        |
| 4.00          |              | 4.0345       | 1.51720        |
| 5.00          |              | 3.9320       | 2.08962        |
| Total         |              | 4.3217       | 1.90237        |
| Aspartate (g) |              | 1.00         | 7.7162         |
|               | 2.00         | 7.6739       | 3.03350        |
|               | 3.00         | 7.5756       | 2.62149        |
|               | 4.00         | 6.9733       | 2.61003        |
|               | 5.00         | 6.6804       | 3.65178        |
|               | Total        | 7.3170       | 3.10982        |
|               | Cysteine (g) | 1.00         | .9911          |
| 2.00          |              | .9763        | .39472         |
| 3.00          |              | .9512        | .31029         |
| 4.00          |              | .9164        | .37612         |
| 5.00          |              | .8648        | .46906         |
| Total         |              | .9392        | .41012         |
| Glutamate (g) |              | 1.00         | 16.0664        |
|               | 2.00         | 15.9671      | 6.57589        |
|               | 3.00         | 15.2191      | 5.25256        |

|                |       |         |         |
|----------------|-------|---------|---------|
|                | 4.00  | 14.4200 | 6.15423 |
|                | 5.00  | 13.6457 | 7.65947 |
|                | Total | 15.0479 | 6.72031 |
| Glycine (g)    | 1.00  | 3.4309  | 1.73802 |
|                | 2.00  | 3.3695  | 1.35987 |
|                | 3.00  | 3.2993  | 1.17542 |
|                | 4.00  | 3.0274  | 1.13268 |
|                | 5.00  | 2.8824  | 1.50288 |
|                | Total | 3.1988  | 1.40936 |
| Histidine (g)  | 1.00  | 2.3918  | 1.16500 |
|                | 2.00  | 2.2956  | .93018  |
|                | 3.00  | 2.2337  | .81269  |
|                | 4.00  | 2.0436  | .76849  |
|                | 5.00  | 1.9750  | 1.04039 |
|                | Total | 2.1865  | .96317  |
| Isoleucine (g) | 1.00  | 3.7829  | 1.81180 |
|                | 2.00  | 3.6685  | 1.48636 |
|                | 3.00  | 3.5558  | 1.28087 |
|                | 4.00  | 3.2788  | 1.26978 |
|                | 5.00  | 3.1489  | 1.61973 |
|                | Total | 3.4843  | 1.51909 |
| Leucine (g)    | 1.00  | 6.5507  | 3.08309 |
|                | 2.00  | 6.3485  | 2.56197 |
|                | 3.00  | 6.1935  | 2.24325 |
|                | 4.00  | 5.6648  | 2.21887 |
|                | 5.00  | 5.4617  | 2.78676 |
|                | Total | 6.0394  | 2.61885 |
| Lysine (g)     | 1.00  | 5.9189  | 2.94185 |
|                | 2.00  | 5.6239  | 2.31294 |
|                | 3.00  | 5.5356  | 2.00737 |
|                | 4.00  | 5.0226  | 1.86655 |
|                | 5.00  | 4.8789  | 2.49196 |
|                | Total | 5.3933  | 2.37633 |
| Methionine (g) | 1.00  | 1.9029  | .93924  |
|                | 2.00  | 1.8112  | .74088  |
|                | 3.00  | 1.7765  | .63853  |
|                | 4.00  | 1.6129  | .60450  |

|                   |       |        |         |
|-------------------|-------|--------|---------|
|                   | 5.00  | 1.5617 | .77918  |
|                   | Total | 1.7321 | .75702  |
| Phenylalanine (g) | 1.00  | 3.7122 | 1.70249 |
|                   | 2.00  | 3.6598 | 1.46165 |
|                   | 3.00  | 3.5498 | 1.27819 |
|                   | 4.00  | 3.2760 | 1.31208 |
|                   | 5.00  | 3.1378 | 1.61936 |
|                   | Total | 3.4639 | 1.49263 |
| Proline (g)       | 1.00  | 5.4316 | 2.61331 |
|                   | 2.00  | 5.3763 | 2.35643 |
|                   | 3.00  | 5.0733 | 1.97905 |
|                   | 4.00  | 4.7395 | 2.16894 |
|                   | 5.00  | 4.4676 | 2.38379 |
|                   | Total | 5.0118 | 2.32336 |
| Serine (g)        | 1.00  | 3.9520 | 1.80548 |
|                   | 2.00  | 3.8568 | 1.54594 |
|                   | 3.00  | 3.7621 | 1.35874 |
|                   | 4.00  | 3.4448 | 1.38634 |
|                   | 5.00  | 3.3226 | 1.75145 |
|                   | Total | 3.6648 | 1.59056 |
| Threonine (g)     | 1.00  | 3.2184 | 1.51528 |
|                   | 2.00  | 3.1146 | 1.24907 |
|                   | 3.00  | 3.0691 | 1.07847 |
|                   | 4.00  | 2.8343 | 1.07223 |
|                   | 5.00  | 2.7080 | 1.45278 |
|                   | Total | 2.9867 | 1.29516 |
| Tryptophan (g)    | 1.00  | .9149  | .42421  |
|                   | 2.00  | .8941  | .35802  |
|                   | 3.00  | .8695  | .29060  |
|                   | 4.00  | .8205  | .33720  |
|                   | 5.00  | .7761  | .40937  |
|                   | Total | .8543  | .36871  |
| Tyrosine (g)      | 1.00  | 2.9980 | 1.43040 |
|                   | 2.00  | 2.8737 | 1.17254 |
|                   | 3.00  | 2.8226 | 1.05205 |
|                   | 4.00  | 2.5414 | 1.00853 |
|                   | 5.00  | 2.4661 | 1.21514 |

|                                     |       |         |          |
|-------------------------------------|-------|---------|----------|
|                                     | Total | 2.7386  | 1.19564  |
| Valine (g)                          | 1.00  | 4.3973  | 2.04517  |
|                                     | 2.00  | 4.2885  | 1.73236  |
|                                     | 3.00  | 4.1521  | 1.48327  |
|                                     | 4.00  | 3.8195  | 1.48738  |
|                                     | 5.00  | 3.6811  | 1.89559  |
|                                     | Total | 4.0645  | 1.75534  |
| animal fat (gram)                   | 1.00  | 33.2604 | 22.55878 |
|                                     | 2.00  | 29.2315 | 19.57020 |
|                                     | 3.00  | 25.3307 | 12.37610 |
|                                     | 4.00  | 23.2438 | 12.42606 |
|                                     | 5.00  | 21.7335 | 14.20867 |
|                                     | Total | 26.5457 | 17.14200 |
| aMED Score                          | 1.00  | 3.36    | 1.740    |
|                                     | 2.00  | 4.59    | 1.970    |
|                                     | 3.00  | 4.26    | 1.901    |
|                                     | 4.00  | 4.41    | 1.962    |
|                                     | 5.00  | 4.16    | 1.670    |
|                                     | Total | 4.14    | 1.879    |
| Ethanol Between 5-15 g/day<br>Grade | 1.00  | .18     | .390     |
|                                     | 2.00  | .28     | .456     |
|                                     | 3.00  | .17     | .377     |
|                                     | 4.00  | .15     | .358     |
|                                     | 5.00  | .23     | .424     |
|                                     | Total | .20     | .401     |
| Fat Intake Grade                    | 1.00  | .34     | .479     |
|                                     | 2.00  | .54     | .505     |
|                                     | 3.00  | .57     | .501     |
|                                     | 4.00  | .56     | .502     |
|                                     | 5.00  | .66     | .479     |

|                |             |      |      |
|----------------|-------------|------|------|
|                | Total       | .53  | .500 |
| Fish Grade     | 1.00        | .41  | .497 |
|                | 2.00        | .44  | .502 |
|                | 3.00        | .50  | .506 |
|                | 4.00        | .56  | .502 |
|                | 5.00        | .43  | .501 |
|                | Total       | .47  | .500 |
|                | Fruit Grade | 1.00 | .41  |
| 2.00           |             | .51  | .506 |
| 3.00           |             | .50  | .506 |
| 4.00           |             | .56  | .502 |
| 5.00           |             | .50  | .506 |
| Total          |             | .50  | .501 |
| Legume Grade   |             | 1.00 | .43  |
|                | 2.00        | .54  | .505 |
|                | 3.00        | .43  | .501 |
|                | 4.00        | .61  | .494 |
|                | 5.00        | .48  | .505 |
|                | Total       | .50  | .501 |
| Meat Grade     | 1.00        | .36  | .487 |
|                | 2.00        | .51  | .506 |
|                | 3.00        | .33  | .477 |
|                | 4.00        | .51  | .506 |
|                | 5.00        | .48  | .505 |
|                | Total       | .44  | .497 |
| Nut/Seed Grade | 1.00        | .36  | .487 |
|                | 2.00        | .67  | .478 |
|                | 3.00        | .50  | .506 |



|                                          |       |         |          |
|------------------------------------------|-------|---------|----------|
|                                          | 4.00  | .41     | .499     |
|                                          | 5.00  | .39     | .493     |
|                                          | Total | .46     | .500     |
| Vegetable Grade                          | 1.00  | .39     | .493     |
|                                          | 2.00  | .59     | .498     |
|                                          | 3.00  | .67     | .477     |
|                                          | 4.00  | .59     | .499     |
|                                          | 5.00  | .48     | .505     |
|                                          | Total | .54     | .500     |
| Whole Grain Grade                        | 1.00  | .48     | .505     |
|                                          | 2.00  | .51     | .506     |
|                                          | 3.00  | .60     | .497     |
|                                          | 4.00  | .46     | .505     |
|                                          | 5.00  | .52     | .505     |
|                                          | Total | .51     | .501     |
| AOAC Determination of<br>Total Fibre (g) | 1.00  | 22.7213 | 10.52434 |
|                                          | 2.00  | 27.6454 | 13.63418 |
|                                          | 3.00  | 25.7279 | 12.19702 |
|                                          | 4.00  | 26.6850 | 13.65110 |
|                                          | 5.00  | 23.6293 | 20.14528 |
|                                          | Total | 25.2071 | 14.46580 |
| Aspartame (g)                            | 1.00  | .0349   | .07953   |
|                                          | 2.00  | .0441   | .11236   |
|                                          | 3.00  | .0260   | .03691   |
|                                          | 4.00  | .0529   | .08904   |
|                                          | 5.00  | .0463   | .07672   |
|                                          | Total | .0408   | .08191   |
| Aspartic acid from<br>Aspartame (g)      | 1.00  | .0173   | .04002   |
|                                          | 2.00  | .0215   | .05637   |

|                                          |       |          |           |
|------------------------------------------|-------|----------|-----------|
|                                          | 3.00  | .0133    | .01848    |
|                                          | 4.00  | .0260    | .04456    |
|                                          | 5.00  | .0230    | .03938    |
|                                          | Total | .0202    | .04124    |
| Phenylalanine from<br>Aspartame (g)      | 1.00  | .0173    | .04002    |
|                                          | 2.00  | .0215    | .05637    |
|                                          | 3.00  | .0133    | .01848    |
|                                          | 4.00  | .0260    | .04456    |
|                                          | 5.00  | .0230    | .03938    |
|                                          | Total | .0202    | .04124    |
| Betaine, no supplements<br>(mg)          | 1.00  | 105.2856 | 73.16336  |
|                                          | 2.00  | 114.6495 | 71.48429  |
|                                          | 3.00  | 106.4856 | 45.66042  |
|                                          | 4.00  | 128.2193 | 107.93564 |
|                                          | 5.00  | 106.6626 | 100.86181 |
|                                          | Total | 112.0233 | 82.74567  |
| Betane + Choline (mg)                    | 1.00  | 460.5840 | 208.69478 |
|                                          | 2.00  | 463.6805 | 189.26427 |
|                                          | 3.00  | 463.2058 | 152.29288 |
|                                          | 4.00  | 449.2588 | 178.62973 |
|                                          | 5.00  | 436.4998 | 327.46581 |
|                                          | Total | 454.3912 | 220.28512 |
| Betane + Choline, no<br>supplements (mg) | 1.00  | 459.0324 | 207.69112 |
|                                          | 2.00  | 458.7002 | 188.73742 |
|                                          | 3.00  | 457.3577 | 146.78493 |
|                                          | 4.00  | 448.1840 | 178.92250 |
|                                          | 5.00  | 434.7476 | 327.63293 |
|                                          | Total | 451.3902 | 219.32430 |

|                          |                      |           |           |
|--------------------------|----------------------|-----------|-----------|
| Caffeine (mg)            | 1.00                 | 186.8364  | 139.52235 |
|                          | 2.00                 | 186.3566  | 161.32581 |
|                          | 3.00                 | 166.9614  | 124.00904 |
|                          | 4.00                 | 137.6879  | 127.64796 |
|                          | 5.00                 | 193.7652  | 160.95703 |
|                          | Total                | 174.7635  | 143.79702 |
|                          | Calories (kcal)      | 1.00      | 1912.1125 |
| 2.00                     |                      | 2027.7805 | 810.05141 |
| 3.00                     |                      | 1886.2335 | 618.98115 |
| 4.00                     |                      | 1825.5671 | 676.62326 |
| 5.00                     |                      | 1668.0720 | 478.50041 |
| Total                    |                      | 1860.3930 | 666.65743 |
| Carbohydrate/kilocalorie |                      | 1.00      | .4939     |
|                          | 2.00                 | .4852     | .08405    |
|                          | 3.00                 | .4981     | .08434    |
|                          | 4.00                 | .5082     | .10015    |
|                          | 5.00                 | .5088     | .07449    |
|                          | Total                | .4990     | .08466    |
|                          | carbohydrates (gram) | 1.00      | 235.2704  |
| 2.00                     |                      | 253.5176  | 122.57396 |
| 3.00                     |                      | 235.0023  | 93.25178  |
| 4.00                     |                      | 245.7783  | 120.56447 |
| 5.00                     |                      | 235.0013  | 170.82647 |
| Total                    |                      | 240.6417  | 122.08135 |
| Carbohydrates (g)        |                      | 1.00      | 235.2704  |
|                          | 2.00                 | 253.5176  | 122.57396 |
|                          | 3.00                 | 235.0023  | 93.25178  |
|                          | 4.00                 | 245.7783  | 120.56447 |

|                               |                             |               |               |
|-------------------------------|-----------------------------|---------------|---------------|
|                               | 5.00                        | 235.0013      | 170.82647     |
|                               | Total                       | 240.6417      | 122.08135     |
| Estimated Free Carnitine (mg) | 1.00                        | 31.3622478800 | 22.1059562800 |
|                               | 2.00                        | 26.4584541800 | 15.1055717600 |
|                               | 3.00                        | 27.3752251100 | 18.1248676700 |
|                               | 4.00                        | 24.6478820200 | 14.2335992400 |
|                               | 5.00                        | 22.4823782100 | 18.1318918200 |
|                               | Total                       | 26.4826946600 | 17.9468464900 |
|                               | Total Fibre from Cereal (g) | 1.00          | 6.1498        |
|                               | 2.00                        | 7.1976        | 4.65477       |
|                               | 3.00                        | 6.0230        | 3.21994       |
|                               | 4.00                        | 7.9962        | 6.59725       |
|                               | 5.00                        | 5.9113        | 3.49780       |
|                               | Total                       | 6.6294        | 4.46043       |
| cholesterol (mg)              | 1.00                        | 228.2273      | 146.27633     |
|                               | 2.00                        | 184.4690      | 97.03697      |
|                               | 3.00                        | 194.1167      | 68.47843      |
|                               | 4.00                        | 165.6286      | 84.59848      |
|                               | 5.00                        | 170.8954      | 118.43345     |
|                               | Total                       | 188.9312      | 108.63016     |
| Cholesterol (mg)              | 1.00                        | 228.2273      | 146.27633     |
|                               | 2.00                        | 184.4690      | 97.03697      |
|                               | 3.00                        | 194.1167      | 68.47843      |

|                                      |       |          |           |
|--------------------------------------|-------|----------|-----------|
|                                      | 4.00  | 165.6286 | 84.59848  |
|                                      | 5.00  | 170.8954 | 118.43345 |
|                                      | Total | 188.9312 | 108.63016 |
| Total Choline, no supplements (mg)   | 1.00  | 353.7473 | 154.35387 |
|                                      | 2.00  | 344.0515 | 132.44406 |
|                                      | 3.00  | 350.8714 | 117.10763 |
|                                      | 4.00  | 319.9655 | 109.58210 |
|                                      | 5.00  | 328.0857 | 233.46392 |
|                                      | Total | 339.3673 | 156.77006 |
| Total Choline (mg)                   | 1.00  | 355.2704 | 155.29048 |
|                                      | 2.00  | 349.0059 | 134.86181 |
|                                      | 3.00  | 356.6844 | 123.86724 |
|                                      | 4.00  | 321.0098 | 109.59259 |
|                                      | 5.00  | 329.8148 | 233.18412 |
|                                      | Total | 342.3398 | 158.35968 |
| Total Fibre from Cruciferous Veg (g) | 1.00  | 1.0042   | 1.62355   |
|                                      | 2.00  | 1.5768   | 1.44739   |
|                                      | 3.00  | 1.1881   | .92371    |
|                                      | 4.00  | 1.1293   | .79642    |
|                                      | 5.00  | 1.7043   | 4.53871   |
|                                      | Total | 1.3215   | 2.36181   |
| Eggs                                 | 1.00  | 2.00     | 1.917     |
|                                      | 2.00  | 1.55     | 2.375     |
|                                      | 3.00  | 2.14     | 2.199     |
|                                      | 4.00  | 1.29     | 2.110     |
|                                      | 5.00  | 1.46     | 2.041     |
|                                      | Total | 1.69     | 2.134     |
| Eggs with Omegat 3 Fatty Acids       | 1.00  | 2.41     | 3.768     |
|                                      | 2.00  | 2.18     | 3.605     |

|                     |       |         |          |
|---------------------|-------|---------|----------|
|                     | 3.00  | 3.00    | 4.047    |
|                     | 4.00  | 2.19    | 3.658    |
|                     | 5.00  | 2.11    | 3.548    |
|                     | Total | 2.38    | 3.709    |
| Eggstotal           | 1.00  | 4.4091  | 4.22791  |
|                     | 2.00  | 3.7436  | 5.03523  |
|                     | 3.00  | 5.1395  | 4.89694  |
|                     | 4.00  | 3.4762  | 4.62885  |
|                     | 5.00  | 3.5652  | 4.61231  |
|                     | Total | 4.0701  | 4.67736  |
| Alcohol (g)         | 1.00  | 9.2471  | 15.32405 |
|                     | 2.00  | 15.3673 | 21.88613 |
|                     | 3.00  | 9.8109  | 17.29616 |
|                     | 4.00  | 14.0143 | 16.45076 |
|                     | 5.00  | 10.1798 | 14.06162 |
|                     | Total | 11.6356 | 17.12652 |
| Ethanol Consumption | 1.00  | 10.0845 | 18.38283 |
|                     | 2.00  | 13.9549 | 17.48756 |
|                     | 3.00  | 11.3117 | 16.82514 |
|                     | 4.00  | 10.4312 | 15.75601 |
|                     | 5.00  | 10.7709 | 14.56666 |
|                     | Total | 11.2602 | 16.54273 |
| Animal Fat (g)      | 1.00  | 33.2604 | 22.55878 |
|                     | 2.00  | 29.2315 | 19.57020 |
|                     | 3.00  | 25.3307 | 12.37610 |
|                     | 4.00  | 23.2438 | 12.42606 |
|                     | 5.00  | 21.7335 | 14.20867 |
|                     | Total | 26.5457 | 17.14200 |
| Fat/kilocalorie     | 1.00  | .3269   | .07869   |
|                     | 2.00  | .3246   | .06390   |
|                     | 3.00  | .3177   | .06784   |
|                     | 4.00  | .2892   | .07237   |
|                     | 5.00  | .3018   | .06422   |
|                     | Total | .3121   | .07049   |

|                           |       |         |          |
|---------------------------|-------|---------|----------|
| Mono-Unsaturated Fats (g) | 1.00  | 26.6347 | 14.73936 |
|                           | 2.00  | 28.9315 | 15.42242 |
|                           | 3.00  | 25.0437 | 11.93564 |
|                           | 4.00  | 22.5381 | 12.58298 |
|                           | 5.00  | 23.5098 | 16.81664 |
|                           | Total | 25.2981 | 14.49222 |
| Poly-Unsaturated Fats (g) | 1.00  | 16.4769 | 11.17235 |
|                           | 2.00  | 17.9083 | 9.57463  |
|                           | 3.00  | 15.8072 | 7.83748  |
|                           | 4.00  | 14.5733 | 7.79749  |
|                           | 5.00  | 15.2807 | 13.73627 |
|                           | Total | 15.9926 | 10.31743 |
| Saturated Fats (g)        | 1.00  | 25.6420 | 16.48765 |
|                           | 2.00  | 23.7527 | 13.75022 |
|                           | 3.00  | 20.5463 | 8.16223  |
|                           | 4.00  | 18.7838 | 9.48215  |
|                           | 5.00  | 18.6000 | 13.16732 |
|                           | Total | 21.4551 | 12.82464 |
| Total Fat (g)             | 1.00  | 75.0136 | 42.31450 |
|                           | 2.00  | 76.4771 | 38.99227 |
|                           | 3.00  | 66.9063 | 27.94849 |
|                           | 4.00  | 60.9662 | 30.59776 |
|                           | 5.00  | 62.2946 | 45.56044 |
|                           | Total | 68.2685 | 38.06492 |
| Vegetable Fat (g)         | 1.00  | 41.7522 | 25.34033 |
|                           | 2.00  | 47.2451 | 25.51660 |
|                           | 3.00  | 41.5758 | 22.01167 |
|                           | 4.00  | 37.7219 | 21.36587 |
|                           | 5.00  | 40.5602 | 35.44003 |
|                           | Total | 41.7224 | 26.51601 |
| Fish Consumption          | 1.00  | 4.66    | 7.820    |

|                                   |       |         |          |
|-----------------------------------|-------|---------|----------|
|                                   | 2.00  | 5.44    | 7.525    |
|                                   | 3.00  | 5.17    | 5.495    |
|                                   | 4.00  | 6.59    | 8.313    |
|                                   | 5.00  | 4.64    | 5.288    |
|                                   | Total | 5.28    | 6.949    |
| Free Choline (mg)                 | 1.00  | 83.6784 | 35.38211 |
|                                   | 2.00  | 97.7017 | 45.84211 |
|                                   | 3.00  | 88.4284 | 36.91255 |
|                                   | 4.00  | 91.6126 | 33.39455 |
|                                   | 5.00  | 91.3357 | 75.28539 |
|                                   | Total | 90.4281 | 48.19116 |
| Free Choline, no supplements (mg) | 1.00  | 82.4127 | 34.26667 |
|                                   | 2.00  | 92.9620 | 42.12063 |
|                                   | 3.00  | 87.1360 | 36.59897 |
|                                   | 4.00  | 90.8450 | 33.51353 |
|                                   | 5.00  | 89.7983 | 75.29827 |
|                                   | Total | 88.5395 | 47.28523 |
| Total Fibre from Fruit (g)        | 1.00  | 5.3716  | 4.33715  |
|                                   | 2.00  | 6.5624  | 4.46372  |
|                                   | 3.00  | 6.8419  | 6.74908  |
|                                   | 4.00  | 5.2340  | 4.00304  |
|                                   | 5.00  | 5.3711  | 5.14338  |
|                                   | Total | 5.8612  | 5.03924  |
| Fruit Consumption                 | 1.00  | 18.34   | 16.596   |
|                                   | 2.00  | 18.21   | 15.142   |
|                                   | 3.00  | 19.86   | 19.394   |
|                                   | 4.00  | 20.78   | 19.748   |
|                                   | 5.00  | 17.41   | 14.767   |
|                                   | Total | 18.90   | 17.121   |
| Fructose (g)                      | 1.00  | 21.7313 | 11.90696 |



|                           |       |         |          |
|---------------------------|-------|---------|----------|
|                           | 2.00  | 25.0551 | 13.55792 |
|                           | 3.00  | 24.2707 | 16.94766 |
|                           | 4.00  | 22.8152 | 10.67046 |
|                           | 5.00  | 25.6674 | 36.47640 |
|                           | Total | 23.9067 | 20.48729 |
| fat for frying: N/A       | 1.00  | 1.00    | .000     |
|                           | 2.00  | .       | .        |
|                           | 3.00  | 1.00    | .        |
|                           | 4.00  | 16.00   | 25.981   |
|                           | 5.00  | 1.00    | .000     |
|                           | Total | 4.21    | 12.027   |
| Follic Acid (B9, ug)      | 1.00  | 780.38  | 446.293  |
|                           | 2.00  | 878.39  | 515.276  |
|                           | 3.00  | 801.58  | 499.296  |
|                           | 4.00  | 945.21  | 497.072  |
|                           | 5.00  | 921.35  | 691.193  |
|                           | Total | 864.88  | 537.494  |
| fat for frying: olive oil | 1.00  | 1.00    | .000     |
|                           | 2.00  | 1.00    | .000     |
|                           | 3.00  | 1.00    | .000     |
|                           | 4.00  | 1.00    | .000     |
|                           | 5.00  | 1.00    | .000     |
|                           | Total | 1.00    | .000     |
| fat for frying: veg oil   | 1.00  | 1.00    | .000     |
|                           | 2.00  | 1.00    | .000     |
|                           | 3.00  | 1.00    | .000     |
|                           | 4.00  | 1.00    | .000     |
|                           | 5.00  | 1.00    | .000     |
|                           | Total | 1.00    | .000     |
| glucose (gm)              | 1.00  | 21.4122 | 10.95877 |
|                           | 2.00  | 23.0980 | 12.69168 |
|                           | 3.00  | 23.3323 | 16.98136 |
|                           | 4.00  | 23.1376 | 12.01889 |
|                           | 5.00  | 23.7491 | 29.57458 |
|                           | Total | 22.9406 | 17.90733 |

|                                            |                                 |         |          |
|--------------------------------------------|---------------------------------|---------|----------|
| Choline from<br>Glycerophosphocholine (mg) | 1.00                            | 69.1551 | 32.78085 |
|                                            | 2.00                            | 68.8478 | 33.93965 |
|                                            | 3.00                            | 70.0416 | 30.88359 |
|                                            | 4.00                            | 63.7669 | 35.83872 |
|                                            | 5.00                            | 62.3237 | 41.03453 |
|                                            | Total                           | 66.7817 | 34.96241 |
|                                            | Total Fibre from Legumes<br>(g) | 1.00    | 1.9798   |
| 2.00                                       |                                 | 2.7700  | 2.33633  |
| 3.00                                       |                                 | 2.7421  | 2.17438  |
| 4.00                                       |                                 | 2.7519  | 3.37253  |
| 5.00                                       |                                 | 2.1389  | 1.54167  |
| Total                                      |                                 | 2.4633  | 2.25216  |
| Legume Consumption                         |                                 | 1.00    | 7.61     |
|                                            | 2.00                            | 10.03   | 8.190    |
|                                            | 3.00                            | 9.21    | 7.925    |
|                                            | 4.00                            | 13.83   | 11.885   |
|                                            | 5.00                            | 10.00   | 8.871    |
|                                            | Total                           | 10.10   | 8.938    |
|                                            | Meat Consumption                | 1.00    | 26.52    |
| 2.00                                       |                                 | 26.08   | 19.943   |
| 3.00                                       |                                 | 26.50   | 21.861   |
| 4.00                                       |                                 | 28.34   | 24.912   |
| 5.00                                       |                                 | 25.55   | 21.869   |
| Total                                      |                                 | 26.59   | 20.900   |
| Mono-Unsaturated to<br>Saturated Fat Ratio |                                 | 1.00    | 1.0949   |
|                                            | 2.00                            | 1.2725  | .40051   |
|                                            | 3.00                            | 1.2303  | .34820   |
|                                            | 4.00                            | 1.2192  | .27290   |
|                                            | 5.00                            | 1.3436  | .48352   |

|                                     |                         |         |          |
|-------------------------------------|-------------------------|---------|----------|
|                                     | Total                   | 1.2313  | .36491   |
| monounsaturat fat (gram)            | 1.00                    | 26.6347 | 14.73936 |
|                                     | 2.00                    | 28.9315 | 15.42242 |
|                                     | 3.00                    | 25.0437 | 11.93564 |
|                                     | 4.00                    | 22.5381 | 12.58298 |
|                                     | 5.00                    | 23.5098 | 16.81664 |
|                                     | Total                   | 25.2981 | 14.49222 |
|                                     | Nut Consumption         | 1.00    | 3.91     |
| 2.00                                |                         | 6.74    | 5.533    |
|                                     | 3.00                    | 5.98    | 5.484    |
|                                     | 4.00                    | 4.61    | 4.811    |
|                                     | 5.00                    | 4.55    | 5.538    |
|                                     | Total                   | 5.12    | 5.059    |
| total Omega (EPA and DHA)<br>(gram) | 1.00                    | .2833   | .30894   |
|                                     | 2.00                    | .3515   | .39070   |
|                                     | 3.00                    | .3884   | .35565   |
|                                     | 4.00                    | .4440   | .39008   |
|                                     | 5.00                    | .3348   | .29635   |
|                                     | Total                   | .3590   | .34985   |
|                                     | Omeget 3 Fatty Acid (g) | 1.00    | .2833    |
| 2.00                                |                         | .3515   | .39070   |
| 3.00                                |                         | .3884   | .35565   |
| 4.00                                |                         | .4440   | .39008   |
| 5.00                                |                         | .3348   | .29635   |
| Total                               |                         | .3590   | .34985   |
| Choline from<br>Phosphocholine (mg) |                         | 1.00    | 16.4573  |
|                                     | 2.00                    | 17.6127 | 8.60674  |
|                                     | 3.00                    | 18.1233 | 7.27847  |

|                                                      |       |          |           |
|------------------------------------------------------|-------|----------|-----------|
|                                                      | 4.00  | 16.2374  | 7.37861   |
|                                                      | 5.00  | 16.5730  | 17.19958  |
|                                                      | Total | 16.9877  | 10.33016  |
| polyunsat fat (gram)                                 | 1.00  | 16.4769  | 11.17235  |
|                                                      | 2.00  | 17.9083  | 9.57463   |
|                                                      | 3.00  | 15.8072  | 7.83748   |
|                                                      | 4.00  | 14.5733  | 7.79749   |
|                                                      | 5.00  | 15.2807  | 13.73627  |
|                                                      | Total | 15.9926  | 10.31743  |
| Crude AAs contributing to indole metabolites (g/day) | 1.00  | 7.6251   | 3.55236   |
|                                                      | 2.00  | 7.4276   | 2.98150   |
|                                                      | 3.00  | 7.2419   | 2.61335   |
|                                                      | 4.00  | 6.6379   | 2.64314   |
|                                                      | 5.00  | 6.3800   | 3.23161   |
|                                                      | Total | 7.0568   | 3.04604   |
| Crude TMA Precursors (mg/day)                        | 1.00  | 496.9063 | 224.92297 |
|                                                      | 2.00  | 501.3069 | 191.00575 |
|                                                      | 3.00  | 481.1912 | 152.57152 |
|                                                      | 4.00  | 474.9596 | 187.11905 |
|                                                      | 5.00  | 462.8276 | 349.48996 |
|                                                      | Total | 483.1554 | 231.60677 |
| protein (gram)                                       | 1.00  | 83.2031  | 38.75183  |
|                                                      | 2.00  | 82.3559  | 32.72237  |
|                                                      | 3.00  | 79.9133  | 27.61129  |
|                                                      | 4.00  | 74.1543  | 28.02093  |
|                                                      | 5.00  | 70.6252  | 37.31005  |
|                                                      | Total | 77.9735  | 33.40517  |
| Protein (g)                                          | 1.00  | 83.2031  | 38.75183  |

|                                             |       |          |           |
|---------------------------------------------|-------|----------|-----------|
|                                             | 2.00  | 82.3559  | 32.72237  |
|                                             | 3.00  | 79.9133  | 27.61129  |
|                                             | 4.00  | 74.1543  | 28.02093  |
|                                             | 5.00  | 70.6252  | 37.31005  |
|                                             | Total | 77.9735  | 33.40517  |
| Animal Protein (g)                          | 1.00  | 56.3113  | 30.04778  |
|                                             | 2.00  | 51.2251  | 23.89068  |
|                                             | 3.00  | 50.9314  | 20.79364  |
|                                             | 4.00  | 44.4805  | 17.88518  |
|                                             | 5.00  | 44.0315  | 22.79271  |
|                                             | Total | 49.3913  | 23.75985  |
| Protein/kilocalorie                         | 1.00  | .1684    | .03132    |
|                                             | 2.00  | .1630    | .02872    |
|                                             | 3.00  | .1700    | .02521    |
|                                             | 4.00  | .1617    | .02838    |
|                                             | 5.00  | .1597    | .03222    |
|                                             | Total | .1646    | .02933    |
| Choline from<br>Phosphatidylcholine (mg)    | 1.00  | 166.4276 | 93.51389  |
|                                             | 2.00  | 148.1651 | 65.11439  |
|                                             | 3.00  | 163.1488 | 65.30780  |
|                                             | 4.00  | 134.9476 | 56.05920  |
|                                             | 5.00  | 144.9002 | 115.82879 |
|                                             | Total | 151.6711 | 83.21959  |
| Phosphatidylcholine, no<br>supplements (mg) | 1.00  | 166.1958 | 93.48570  |
|                                             | 2.00  | 147.9722 | 65.20639  |
|                                             | 3.00  | 158.6614 | 55.09316  |
|                                             | 4.00  | 134.6995 | 56.00111  |
|                                             | 5.00  | 144.7285 | 115.81070 |
|                                             | Total | 150.6129 | 81.66243  |

|                                 |       |          |           |
|---------------------------------|-------|----------|-----------|
| Canola Oil                      | 1.00  | 1.00     | .000      |
|                                 | 2.00  | 1.00     | .000      |
|                                 | 3.00  | 1.00     | .000      |
|                                 | 4.00  | 1.00     | .000      |
|                                 | 5.00  | 1.00     | .000      |
|                                 | Total | 1.00     | .000      |
| Sex                             | 1.00  | .33      | .476      |
|                                 | 2.00  | .46      | .504      |
|                                 | 3.00  | .40      | .495      |
|                                 | 4.00  | .36      | .483      |
|                                 | 5.00  | .50      | .505      |
|                                 | Total | .41      | .492      |
| Choline from Sphingomyelin (mg) | 1.00  | 19.5504  | 11.49657  |
|                                 | 2.00  | 16.6778  | 8.04708   |
|                                 | 3.00  | 16.9433  | 6.68395   |
|                                 | 4.00  | 14.4433  | 6.18492   |
|                                 | 5.00  | 14.6817  | 8.72247   |
|                                 | Total | 16.4705  | 8.61528   |
| Sucralose (g)                   | 1.00  | .5844    | 2.14674   |
|                                 | 2.00  | .7683    | 3.79955   |
|                                 | 3.00  | .3023    | .90610    |
|                                 | 4.00  | .9552    | 2.36443   |
|                                 | 5.00  | .9680    | 2.37542   |
|                                 | Total | .7164    | 2.46402   |
| Total Sugars (g)                | 1.00  | 105.7724 | 43.23796  |
|                                 | 2.00  | 106.0356 | 51.27119  |
|                                 | 3.00  | 108.4423 | 55.52132  |
|                                 | 4.00  | 104.4610 | 51.92571  |
|                                 | 5.00  | 111.4078 | 103.16065 |
|                                 | Total | 107.2920 | 64.82392  |
| total sugars (gm)               | 1.00  | 105.7724 | 43.23796  |
|                                 | 2.00  | 106.0356 | 51.27119  |
|                                 | 3.00  | 108.4423 | 55.52132  |
|                                 | 4.00  | 104.4610 | 51.92571  |
|                                 | 5.00  | 111.4078 | 103.16065 |

|                       |       |          |          |
|-----------------------|-------|----------|----------|
|                       | Total | 107.2920 | 64.82392 |
| total fat (gram)      | 1.00  | 75.0136  | 42.31450 |
|                       | 2.00  | 76.4771  | 38.99227 |
|                       | 3.00  | 66.9063  | 27.94849 |
|                       | 4.00  | 60.9662  | 30.59776 |
|                       | 5.00  | 62.2946  | 45.56044 |
|                       | Total | 68.2685  | 38.06492 |
| total trans fat; 2011 | 1.00  | 1.3569   | .79746   |
|                       | 2.00  | 1.4005   | .89353   |
|                       | 3.00  | 1.2044   | .52229   |
|                       | 4.00  | 1.1850   | .71889   |
|                       | 5.00  | 1.2043   | 1.04962  |
|                       | Total | 1.2693   | .81611   |

### Descriptives

|                                |       | Mean    | Std. Deviation |
|--------------------------------|-------|---------|----------------|
| Vegetable oil                  | 1.00  | 1.00    | .000           |
|                                | 2.00  | 1.00    | .000           |
|                                | 3.00  | 1.00    | .000           |
|                                | 4.00  | 1.00    | .000           |
|                                | 5.00  | 1.00    | .000           |
|                                | Total | 1.00    | .000           |
| Total Fibre from Vegetable (g) | 1.00  | 6.4589  | 4.27041        |
|                                | 2.00  | 8.8385  | 5.60332        |
|                                | 3.00  | 8.2147  | 4.47470        |
|                                | 4.00  | 8.7519  | 6.22246        |
|                                | 5.00  | 8.1863  | 12.02784       |
|                                | Total | 8.0664  | 7.18760        |
| Vegetable Consumption          | 1.00  | 35.75   | 25.939         |
|                                | 2.00  | 49.85   | 36.087         |
|                                | 3.00  | 48.10   | 33.844         |
|                                | 4.00  | 53.49   | 41.139         |
|                                | 5.00  | 44.23   | 34.938         |
|                                | Total | 46.08   | 34.819         |
| Vegetable Protein (g)          | 1.00  | 26.8911 | 11.61602       |
|                                | 2.00  | 31.1298 | 15.50529       |
|                                | 3.00  | 28.9828 | 12.36634       |

|                         |       |         |          |
|-------------------------|-------|---------|----------|
|                         | 4.00  | 29.6736 | 16.18149 |
|                         | 5.00  | 26.5933 | 18.50148 |
|                         | Total | 28.5818 | 15.02303 |
| vegetable fat (gram)    | 1.00  | 41.7522 | 25.34033 |
|                         | 2.00  | 47.2451 | 25.51660 |
|                         | 3.00  | 41.5758 | 22.01167 |
|                         | 4.00  | 37.7219 | 21.36587 |
|                         | 5.00  | 40.5602 | 35.44003 |
|                         | Total | 41.7224 | 26.51601 |
| Whole Grain Consumption | 1.00  | 11.61   | 8.659    |
|                         | 2.00  | 13.74   | 11.042   |
|                         | 3.00  | 15.76   | 11.433   |
|                         | 4.00  | 14.59   | 15.406   |
|                         | 5.00  | 12.89   | 10.228   |
|                         | Total | 13.69   | 11.500   |

### ANOVA

|                   |                | Sig. |
|-------------------|----------------|------|
| Alanine (g)       | Between Groups | .329 |
| Arginine (g)      | Between Groups | .298 |
| Aspartate (g)     | Between Groups | .406 |
| Cysteine (g)      | Between Groups | .606 |
| Glutamate (g)     | Between Groups | .382 |
| Glycine (g)       | Between Groups | .291 |
| Histidine (g)     | Between Groups | .213 |
| Isoleucine (g)    | Between Groups | .245 |
| Leucine (g)       | Between Groups | .237 |
| Lysine (g)        | Between Groups | .205 |
| Methionine (g)    | Between Groups | .180 |
| Phenylalanine (g) | Between Groups | .293 |
| Proline (g)       | Between Groups | .231 |
| Serine (g)        | Between Groups | .272 |
|                   |                | .318 |
|                   |                | .383 |
|                   |                | .172 |
|                   |                | .249 |



|                                       |                       |             |
|---------------------------------------|-----------------------|-------------|
| Threonine (g)                         | <u>Between Groups</u> | <u>.009</u> |
| Tryptophan (g)                        | <u>Between Groups</u> | <u>.027</u> |
| Tyrosine (g)                          | <u>Between Groups</u> | <u>.570</u> |
| Valine (g)                            | <u>Between Groups</u> |             |
| animal fat (gram)                     | <u>Between Groups</u> |             |
| aMED Score                            | <u>Between Groups</u> |             |
| Ethanol Between 5-15 g/day Grade      | <u>Between Groups</u> |             |
| Fat Intake Grade                      | <u>Between Groups</u> | <u>.045</u> |
| Fish Grade                            | <u>Between Groups</u> | <u>.632</u> |
| Fruit Grade                           | <u>Between Groups</u> | <u>.728</u> |
| Fruit Grade                           | <u>Between Groups</u> | <u>.418</u> |
| Legume Grade                          | <u>Between Groups</u> | <u>.298</u> |
| Meat Grade                            | <u>Between Groups</u> | <u>.041</u> |
| Meat Grade                            | <u>Between Groups</u> | <u>.081</u> |
| Nut/Seed Grade                        | <u>Between Groups</u> | <u>.781</u> |
| Vegetable Grade                       | <u>Between Groups</u> | <u>.476</u> |
| Whole Grain Grade                     | <u>Between Groups</u> |             |
| AOAC Determination of Total Fibre (g) | <u>Between Groups</u> |             |
| Aspartame (g)                         | <u>Between Groups</u> | <u>.593</u> |
| Aspartic acid from Aspartame (g)      | <u>Between Groups</u> | <u>.646</u> |
| Phenylalanine from Aspartame (g)      | <u>Between Groups</u> | <u>.646</u> |
| Betaine, no supplements (mg)          | <u>Between Groups</u> | <u>.678</u> |
| Betane + Choline (mg)                 | <u>Between Groups</u> | <u>.974</u> |
| Betane + Choline, no supplements (mg) | <u>Between Groups</u> | <u>.982</u> |
| Caffeine (mg)                         | <u>Between Groups</u> | <u>.368</u> |
| Calories (kcal)                       | <u>Between Groups</u> | <u>.151</u> |

|                                      |                |             |
|--------------------------------------|----------------|-------------|
| Carbohydrate/kilocalorie             | Between Groups | <u>.684</u> |
|                                      |                | <u>.939</u> |
| carbohydrates (gram)                 | Between Groups | <u>.939</u> |
| Carbohydrates (g)                    | Between Groups | <u>.201</u> |
| Estimated Free Carnitine (mg)        | Between Groups |             |
| Total Fibre from Cereal (g)          | Between Groups | <u>.129</u> |
|                                      |                | <u>.053</u> |
| cholesterol (mg)                     | Between Groups | <u>.053</u> |
| Cholesterol (mg)                     | Between Groups | <u>.824</u> |
| Total Choline, no supplements (mg)   | Between Groups |             |
| Total Choline (mg)                   | Between Groups | <u>.780</u> |
|                                      |                | <u>.576</u> |
| Total Fibre from Cruciferous Veg (g) | Between Groups |             |
| Eggs                                 | Between Groups | <u>.281</u> |
| Eggs with Omegat 3 Fatty Acids       | Between Groups | <u>.799</u> |
| Eggstotal                            | Between Groups | <u>.425</u> |
|                                      |                | <u>.350</u> |
| Alcohol (g)                          | Between Groups | <u>.847</u> |
| Ethanol Consumption                  | Between Groups | <u>.009</u> |
| Animal Fat (g)                       | Between Groups | <u>.065</u> |
|                                      |                | <u>.269</u> |
| Fat/kilocalorie                      | Between Groups | <u>.641</u> |
| Mono-Unsaturated Fats (g)            | Between Groups | <u>.032</u> |
| Poly-Unsaturated Fats (g)            | Between Groups | <u>.195</u> |
|                                      |                | <u>.591</u> |
| Saturated Fats (g)                   | Between Groups | <u>.702</u> |
| Total Fat (g)                        | Between Groups | <u>.752</u> |
| Vegetable Fat (g)                    | Between Groups | <u>.866</u> |
| Fish Consumption                     | Between Groups |             |
| Free Choline (mg)                    | Between Groups |             |
| Free Choline, no supplements (mg)    | Between Groups |             |

|                                                         |                |             |
|---------------------------------------------------------|----------------|-------------|
| Total Fibre from Fruit (g)                              | Between Groups | <u>.418</u> |
|                                                         |                | <u>.901</u> |
| Fruit Consumption                                       | Between Groups | <u>.895</u> |
| Fructose (g)                                            | Between Groups | <u>.325</u> |
| fat for frying: N/A                                     | Between Groups | <u>.531</u> |
|                                                         |                | .           |
| Follic Acid (B9, ug)                                    | Between Groups | .           |
| fat for frying: olive oil                               | Between Groups | <u>.979</u> |
| fat for frying: veg oil                                 | Between Groups | <u>.779</u> |
| glucose (gm)                                            | Between Groups |             |
| Choline from<br>Glycerophosphocholine (mg)              | Between Groups |             |
| Total Fibre from Legumes<br>(g)                         | Between Groups | <u>.274</u> |
| Legume Consumption                                      | Between Groups | <u>.025</u> |
| Meat Consumption                                        | Between Groups | <u>.981</u> |
|                                                         |                | <u>.027</u> |
| Mono-Unsaturated to<br>Saturated Fat Ratio              | Between Groups |             |
| monounsaturat fat (gram)                                | Between Groups | <u>.269</u> |
|                                                         |                | <u>.067</u> |
| Nut Consumption                                         | Between Groups | <u>.275</u> |
| total Omega (EPA and DHA)<br>(gram)                     | Between Groups |             |
| Omegasat 3 Fatty Acid (g)                               | Between Groups | <u>.275</u> |
| Choline from<br>Phosphocholine (mg)                     | Between Groups | <u>.899</u> |
| polyunsaturat fat (gram)                                | Between Groups | <u>.641</u> |
|                                                         | Between Groups | <u>.250</u> |
| Crude AAs contributing to indole<br>metabolites (g/day) |                |             |
| Crude TMA Precursors<br>(mg/day)                        | Between Groups | <u>.941</u> |
| protein (gram)                                          | Between Groups | <u>.318</u> |
| Protein (g)                                             | Between Groups | <u>.318</u> |
|                                                         |                | <u>.077</u> |
| Animal Protein (g)                                      | Between Groups |             |

|                                          |                       |             |
|------------------------------------------|-----------------------|-------------|
| <u>Protein/kilocalorie</u>               | <u>Between Groups</u> | <u>.410</u> |
| Choline from                             | Between Groups        | .368        |
| Phosphatidylcholine (mg)                 |                       |             |
| Phosphatidylcholine, no supplements (mg) | Between Groups        | .418        |
| <u>Canola Oil</u>                        | <u>Between Groups</u> | <u>.</u>    |
| <u>Sex</u>                               | <u>Between Groups</u> | <u>.385</u> |
| Choline from Sphingomyelin (mg)          | Between Groups        | .035        |
| Sucralose (g)                            | Between Groups        | .696        |
| <u>Total Sugars (g)</u>                  | <u>Between Groups</u> | <u>.989</u> |
| <u>total sugars (gm)</u>                 | <u>Between Groups</u> | <u>.989</u> |
| <u>total fat (gram)</u>                  | <u>Between Groups</u> | <u>.195</u> |
| <u>total trans fat; 2011</u>             | <u>Between Groups</u> | <u>.632</u> |
| Total Fibre from Vegetable (g)           |                       | .539        |
| Vegetable Consumption                    |                       | .167        |
| Vegetable Protein (g)                    |                       | .594        |
| vegetable fat (gram)                     |                       | .591        |
| <u>Whole Grain Consumption</u>           |                       | <u>.518</u> |
